# Supplementary material for: T helper cells with specificity for an antigen in cardiomyocytes promote pressure overload-induced progression from hypertrophy to heart failure
Source: PubMed Central journal article supplement (PMC5700082; doi:10.1038/s41598-017-16147-1), 2017-11-22
Supplement: 41598_2017_16147_MOESM1_ESM.pdf [file 41598_2017_16147_MOESM1_ESM.pdf]

# Supplementary Materials

**T helper cells with specificity for an antigen in cardiomyocytes promote pressure overload-induced progression from hypertrophy to heart failure**

Carina Gröschel, André Sasse, Charlotte Röhrborn, Sebastian Monecke, Michael Didié, Leslie Elsner, Vanessa Kruse, Gertrude Bunt, Andrew H. Lichtman, Karl Toischer, Wolfram-Hubertus Zimmermann, Gerd Hasenfuß, Ralf Dressel

Supplementary Figures 1 to 8

Supplementary Table 1

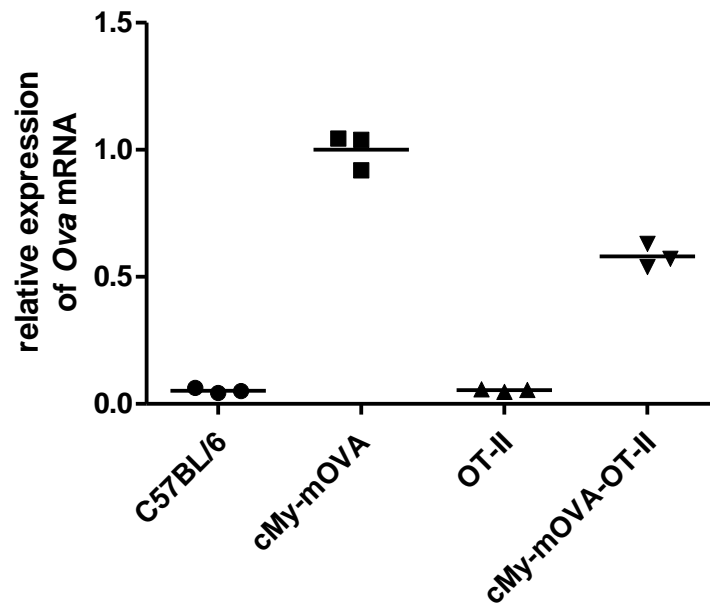

**Supplementary Figure 1.** *Ova* mRNA is expressed in the hearts of cMy-mOVA and cMy-mOVA-OT-II but not in C57BL/6 and OT-II mice. The mRNA expression was determined in hearts of mice of these strains (n=3) by qPCR in comparison to the house keeping gene *Gapdh*. The  $\Delta\text{ct}$  values (ct *Ova* minus ct *Gapdh*) were used to calculate the relative expression of *Ova* in single heart samples in reference to the mean of the  $\Delta\text{ct}$  values for the hearts of cMy-mOVA mice ( $\Delta\text{ct}$  reference) ( $2^{\Delta\text{ct } Ova} / 2^{\Delta\text{ct reference}}$ ). Single data points and their means are shown. An ANOVA indicated significant differences between the strains ( $P=8.03 \times 10^{-9}$ ) and Bonferroni post hoc tests revealed differences ( $P<0.001$ ) between all strains with exception of the comparison of C57BL/6 and OT-II mice. The cMy-mOVA mice were homozygous for the *Ova* transgene whereas cMy-mOVA-OT-II were hemizygous explaining the difference in *Ova* expression levels between these strains.

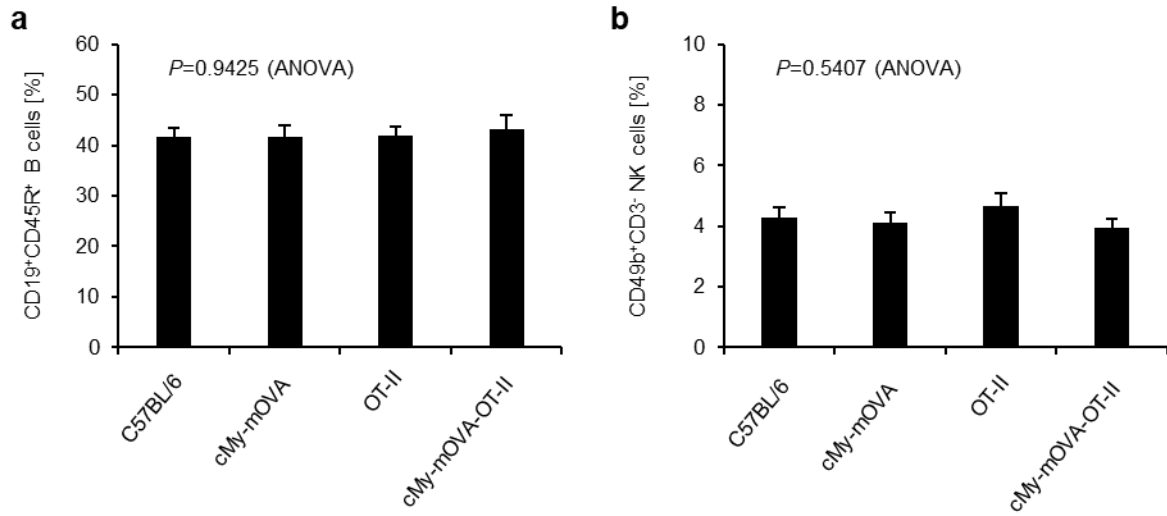

**Supplementary Figure 2.** The frequency of B cells and NK cells is not altered in the spleen of cMy-mOVA-OT-II mice. Splenocytes derived from 8 to 12 weeks old C57BL/6, cMy-mOVA, OT-II, and cMy-mOVA-OT-II mice (n=8 for each strain) were analyzed by flow cytometry for CD19<sup>+</sup>CD45R<sup>+</sup> B cells (**a**) and CD49b<sup>+</sup>CD3<sup>-</sup> NK cells (**b**), Means and SEM are shown. The data were analyzed by ANOVA and the *P*-values are given in the figure.

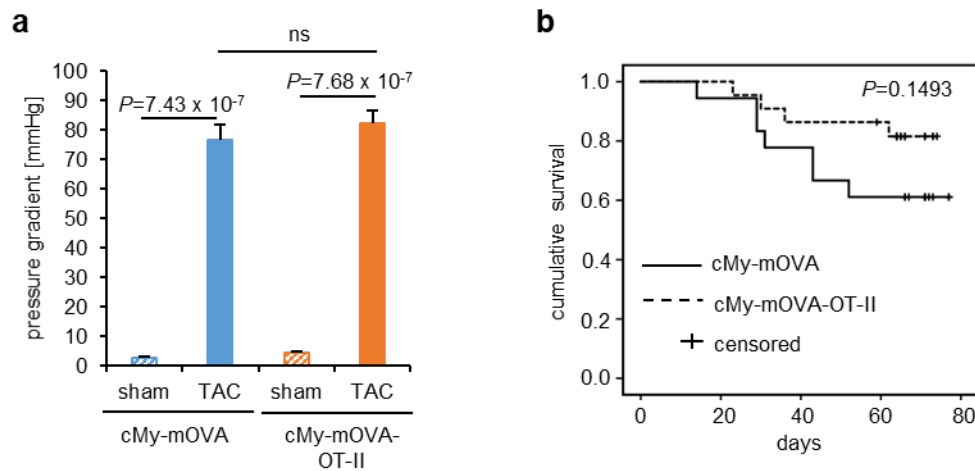

**Supplementary Figure 3.** The aortic stenosis after TAC operation was similar in cMy-mOVA and cMy-mOVA-OT-II mice and the survival of the animals was not different. **(a)** The pressure gradient over the aortic ligature was determined 3 days after surgery using pulsed wave Doppler in sham (n=22) and TAC-operated (n=18) cMy-mOVA mice as well as in sham (n=15) and TAC-operated (n=22) cMy-mOVA-OT-II mice. Means plus SEM are shown. Differences between two groups were analyzed by U-tests and significant *P*-values are indicated (ns, non-significant). **(b)** Kaplan-Meier survival curves for TAC-operated cMy-mOVA and cMy-mOVA-OT-II mice are displayed. A log-rank test (Mantel-Cox) did not indicate a significant difference between the strains. All sham-operated mice of both strains survived until the end of the experiment and are therefore not displayed in the figure.

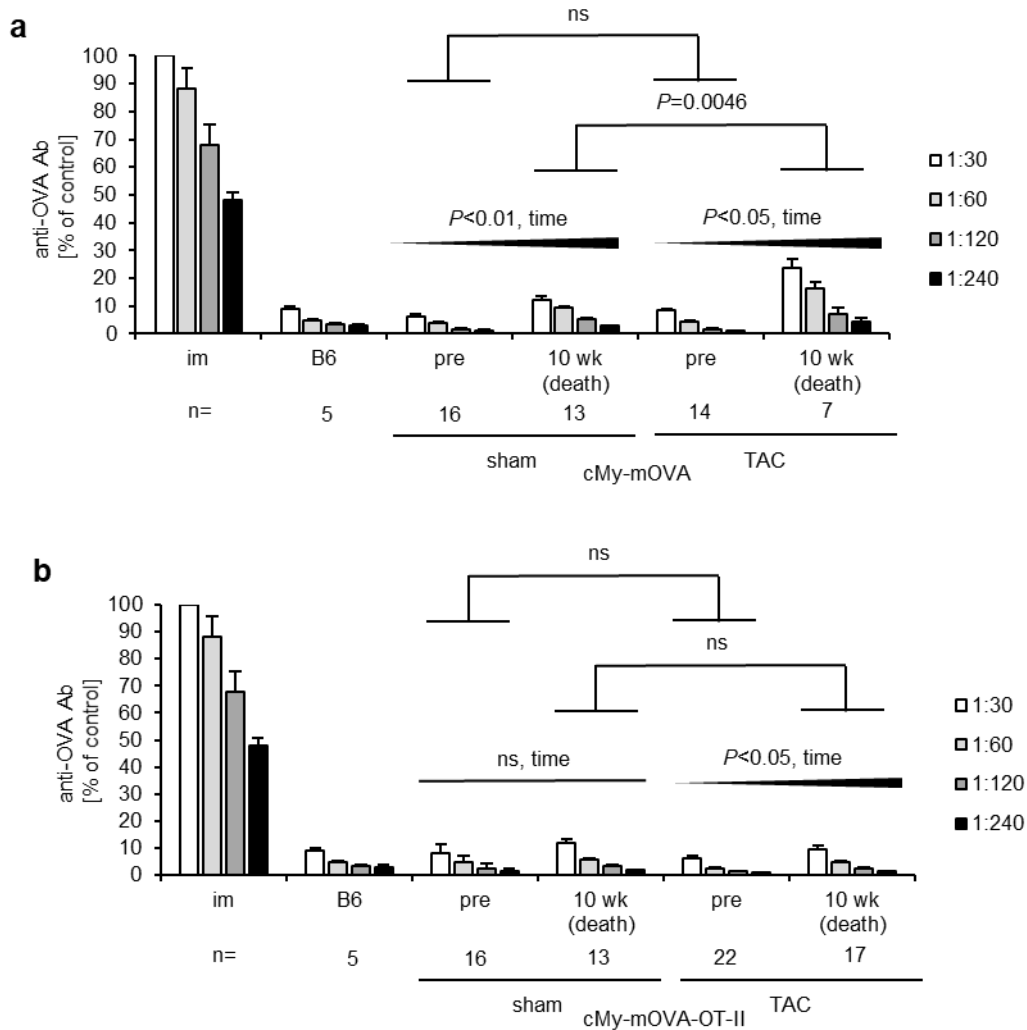

**Supplementary Figure 4.** Slight induction of OVA-specific autoantibodies in cMy-mOVA mice after TAC. OVA-specific autoantibodies were determined by ELISA in serial-diluted (1:30, 1:60, 1:120, 1:240) sera of (a) cMy-mOVA and (b) cMy-mOVA-OT-II mice before (pre) and at 10 weeks after sham or TAC surgery when the mice were sacrificed. Pooled serum (pre-diluted 1:10000) of 4 FVB mice immunized with OVA (im) served as positive control on each plate and the OD at the highest dilution was set to 100 % to adjust the other results and means plus SEM are shown. Sera of C57BL/6 (B6) mice (n=5) served as negative control. The numbers of analyzed animals are indicated. The increase of anti-OVA antibodies over time (pre compared to 10 weeks) and differences between sham and TAC-operated mice have been analyzed by repeated measures ANOVA and significant *P*-values are indicated (ns, non-significant).

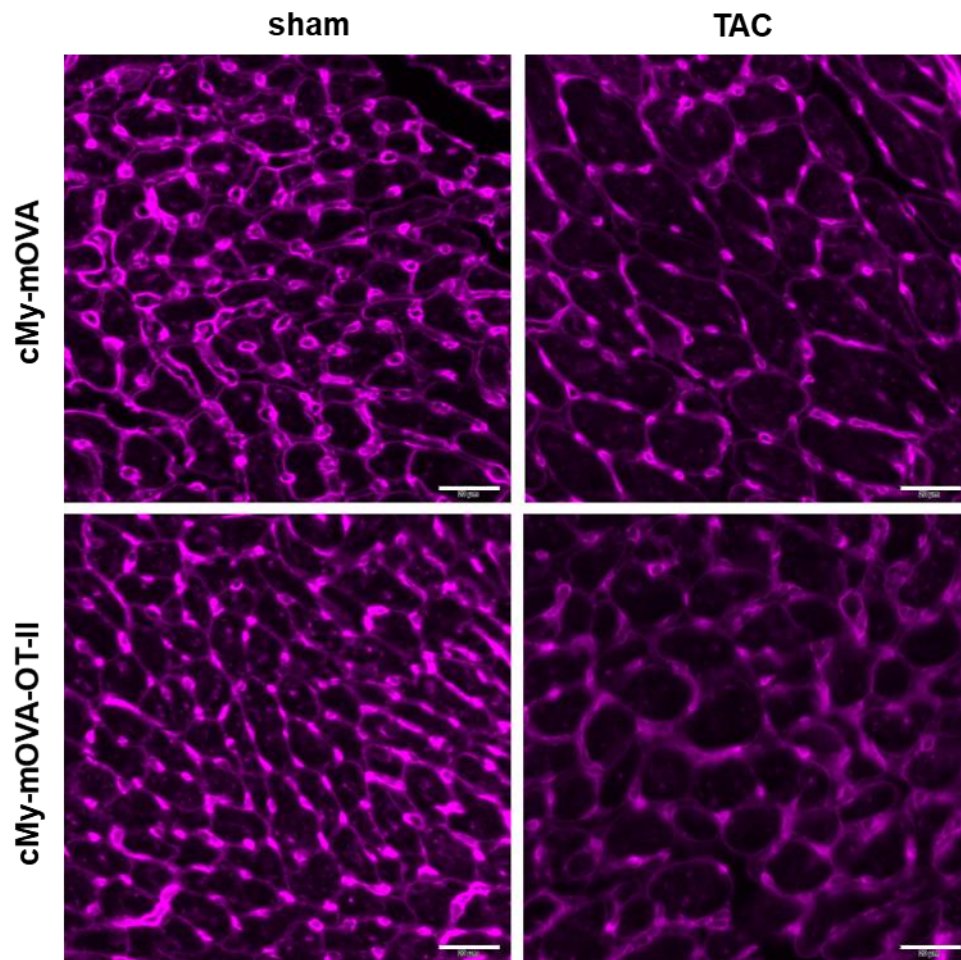

**Supplementary Figure 5.** Heart sections were stained as exemplified here with Alexa680-labeled WGA, which stains plasma membranes, to determine the CSA of cardiomyocytes in ventricles of sham and TAC-operated cMy-mOVA and cMy-mOVA-OT-II mice. The bars indicate 20  $\mu$ m.

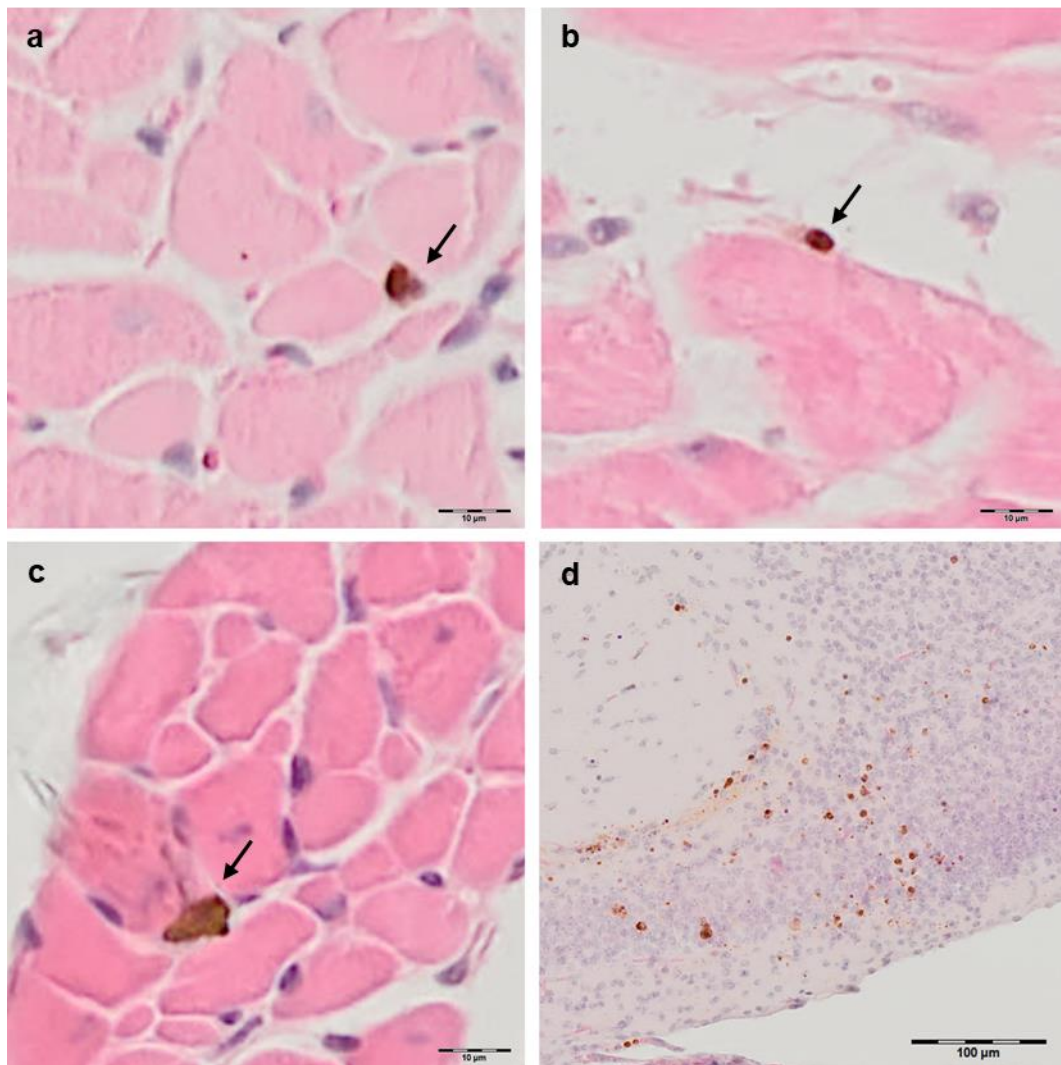

**Supplementary Figure 6.** In heart sections of TAC-operated mice (**a-c**), apoptotic cells expressing cleaved caspase 3 were detected by immunohistochemistry and are marked by an arrow. Whereas most apoptotic cells were non-cardiomyocytes (**a, b**), an apoptotic cardiomyocyte (**c**) was detected in a cMy-mOVA mouse. A section of a hippocampus of a 7 days old mouse, which contains several apoptotic cells, is shown as positive control (**d**). The bars indicate 10  $\mu\text{m}$  in panels (**a-c**) and 100  $\mu\text{m}$  in panel **d**.

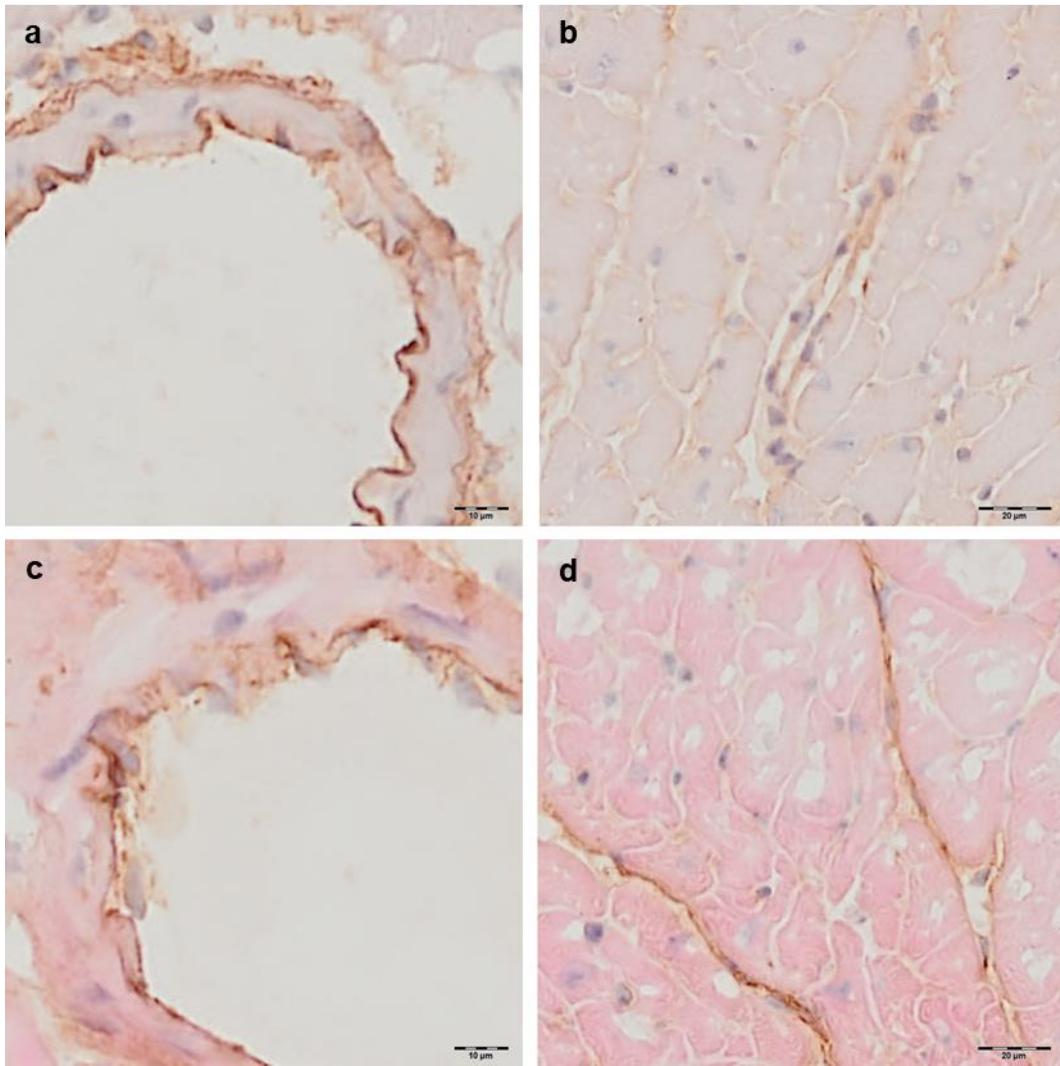

**Supplementary Figure 7.** In heart sections of cMy-mOVA (**a, b**) and cMy-mOVA-OT-II mice (**c, d**), endothelial cells expressing CD31 (PECAM-1) were detected by immunohistochemistry. In panels **a** and **c**, the endothelial cells of larger vessels are stained whereas panels **b** and **d** display capillaries in the myocardium. The bars indicate 10 μm in panels **a** and **c** and 20 μm in panel **b** and **d**.



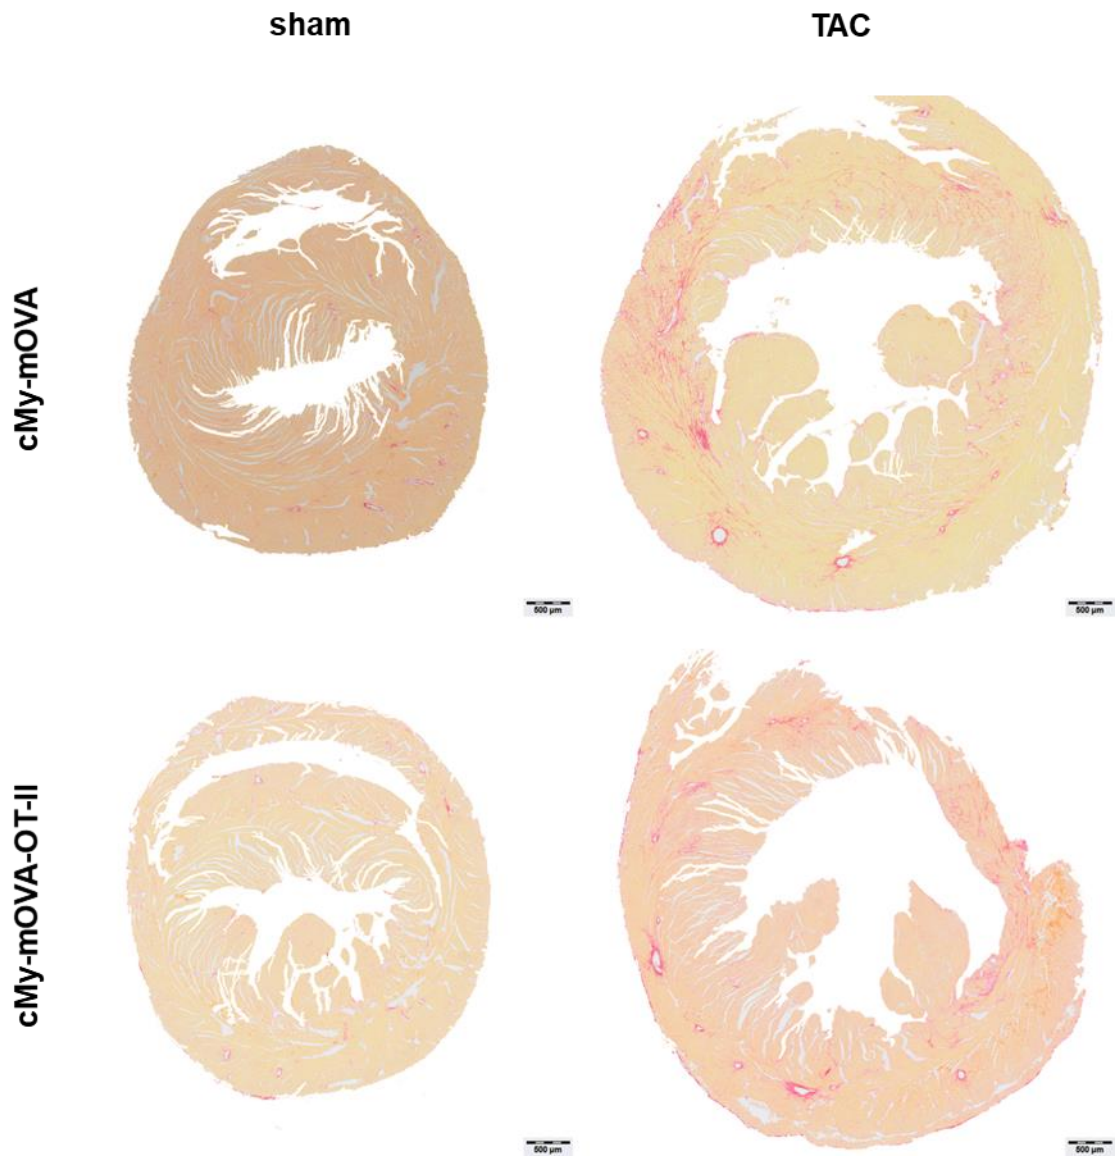

**Supplementary Figure 8.** Heart sections were stained as exemplified here with Sirius Red, which stains collagen, to determine the fibrotic areas in the ventricles of sham and TAC-operated cMy-mOVA and cMy-mOVA-OT-II mice. Fibrotic areas directly associated with vessels with a diameter of more than 100 µm were considered as perivascular fibrosis. The bars indicate 500 µm.

**Supplementary Tab. 1** Antibodies and isotype controls used for flow cytometry

| Antigen              | Isotype                | Clone        | Label        | Supplier                 |
|----------------------|------------------------|--------------|--------------|--------------------------|
| CD3                  | rat IgG <sub>2b</sub>  | 17A2         | FITC<br>PE   | Biolegend, Fell, Germany |
| CD4                  | rat IgG <sub>2a</sub>  | RM4-5        | PE<br>PE/Cy5 | Biolegend, Fell, Germany |
| CD8                  | rat IgG <sub>2a</sub>  | 53-6.7       | PE/Cy5       | Biolegend, Fell, Germany |
| CD19                 | rat IgG <sub>2a</sub>  | 6D5          | FITC         | Biolegend, Fell, Germany |
| CD25                 | rat IgG <sub>1</sub>   | PC61         | FITC         | Biolegend, Fell, Germany |
| CD45R/B220           | rat IgG <sub>2a</sub>  | RA3-6B2      | PE           | Biolegend, Fell, Germany |
| CD49b                | rat IgM                | DX5          | PE           | BioLegend, Fell, Germany |
| CD69                 | hamster IgG            | H1.2F3       | PE           | BioLegend, Fell, Germany |
| FOXP3                | mouse IgG <sub>1</sub> | 150D         | PE           | BioLegend, Fell, Germany |
| IL-2                 | rat IgG <sub>2b</sub>  | JES6-5H4     | PE           | Biolegend, Fell, Germany |
| IL-4                 | rat IgG <sub>1</sub>   | 11B11        | PE           | Biolegend, Fell, Germany |
| IL-6                 | rat IgG <sub>1</sub>   | MP5-20F3     | PE           | Biolegend, Fell, Germany |
| IL-17A               | rat IgG <sub>1</sub>   | TC11-18H10.1 | PE           | Biolegend, Fell, Germany |
| IL-17F               | mouse IgG <sub>1</sub> | 9D3.1C8      | PE           | BioLegend, Fell, Germany |
| IL-10                | rat IgG <sub>2b</sub>  | JES5-16E3    | PE           | Biolegend, Fell, Germany |
| IFN- $\gamma$        | rat IgG <sub>1</sub>   | XMG1.2       | PE           | Biolegend, Fell, Germany |
| TCR $\gamma\delta$   | hamster IgG            | GL3          | PE           | BioLegend, Fell, Germany |
| TCRV $\beta$ 5.1/5.2 | mouse IgG <sub>1</sub> | MR9-4        | FITC         | BioLegend, Fell, Germany |
| TNF- $\alpha$        | rat IgG <sub>1</sub>   | MP6-XT22     | PE           | Biolegend, Fell, Germany |
| TGF- $\beta$         | mouse IgG <sub>1</sub> | TW7-20B9     | PE           | BioLegend, Fell, Germany |
| -                    | hamster IgG            | HTK888       | PE           | BioLegend, Fell, Germany |
| -                    | mouse IgG <sub>1</sub> | MOPC-21      | FITC<br>PE   | BioLegend, Fell, Germany |
| -                    | rat IgG <sub>1</sub>   | RTK2071      | FITC<br>PE   | BioLegend, Fell, Germany |

| <b>Antigen</b> | <b>Isotype</b>        | <b>Clone</b> | <b>Label</b> | <b>Supplier</b>          |
|----------------|-----------------------|--------------|--------------|--------------------------|
| -              | rat IgG <sub>2a</sub> | RTK2758      | FITC<br>PE   | BioLegend, Fell, Germany |
| -              | rat IgG <sub>2b</sub> | RTK4530      | FITC<br>PE   | BioLegend, Fell, Germany |
| -              | rat IgM               | RTK2118      | PE           | BioLegend, Fell, Germany |

The following abbreviations are used: FITC, fluorescein isothiocyanate, PE, phycoerythrin; PE/Cy5, phycoerythrin/cyanine 5.
